# Supplementary material for: Fragile TIM-4–expressing tissue resident macrophages are migratory and immunoregulatory
Source: JCI journal article supplement (doi:10.1172/jci73527), 2014-07-01
Supplement: sd1 [file 1]

## **SUPPLEMENTAL METHODS**

### *Measurement of peritoneal macrophage apoptosis by Celigo plate imaging cytometer*

For Celigo experiments, 0.1 ml containing  $5 \times 10^4$  cells was seeded into 96 well plates for 30 min to allow macrophage adherence. Adherent macrophages were washed 2 times with media and treated with the indicated concentration of  $H_2O_2$  (Sigma Aldrich) in IMDM plus 10% FBS for the indicated period of time. Anti-F4/80 and DAPI were added prior to being read serially using a Celigo S plate imaging cytometer (Celigo, Redwood City, CA).

### *Skin Transplantation*

Tail skin from wild type or TIM-4<sup>-/-</sup> bm12 mice was transplanted onto ABM TCR transgenic mice. Skin allograft rejection was defined as the day on which 100% of the graft was necrotic.

### *Cytometer Configurations*

In FITC painting experiments, PE fluorescence was acquired using yellow/green (561 nm) excitation and a standard PE bandpass emission filter in order to avoid excessive spillover generated by high levels of FITC using blue (488 nm) excitation. Live/Dead Blue and DAPI staining were acquired using UV (355 nm) excitation and a 425/50 bandpass emission filter. All other fluorochromes were read using standard excitation and emission parameters.

### *Immunohistochemistry and Immunofluorescence*

Wild type and TIM-4<sup>-/-</sup> C57BL/6 heart allografts were harvested 3 or 7 days after transplantation into wild type BALB/c recipients. Tissues were snap-frozen in OCT tissue medium or formalin fixed and embedded in paraffin. Paraffin-embedded tissues were cut into 5 µm sections and stained with hematoxylin and eosin (H&E). Snap-frozen tissues were cut into 5 µm sections and stained with monoclonal rat anti-mouse CD169 (MOMA-1, Abcam, Cambridge, MA) and polyclonal goat anti-mouse TIM-4 (R&D Systems, Minneapolis, MN). Sections were subsequently stained with anti-rat Alexa fluor 488 and anti-goat Cy5. Slides were sealed with mounting medium containing DAPI (Vector Laboratories). Images were acquired on a Zeiss LSM 510 Meta (Carl Zeiss, Thornwood, NY).

#### *Generation of TIM-4<sup>-/-</sup> bm12 mice*

Bm12 mice (TIM-4<sup>+/+</sup>I-A<sup>bm12/bm12</sup>) were crossed with C57BL/6 TIM-4<sup>-/-</sup> (TIM-4<sup>-/-</sup> I-A<sup>b/b</sup>) mice(1). Mice homozygous for TIM-4<sup>-/-</sup> and the I-A<sup>bm12</sup> (bm12) alleles (TIM-4<sup>-/-</sup> I-A<sup>bm12/bm12</sup>) were derived by screening F2 progeny for TIM-4 deletion as previously described (44) and screening for the bm12 mutation by amplifying the region containing the three single nucleotide polymorphisms that define the bm12 mutation (Forward primer 5'- CATTACCTGTGCCTTAGAGATGG-3'; Reverse primer 5'- CATTCCCTAATAAGCTGTGTGGATG-3'; Product size = 554 bp and subsequently digesting the product with restriction enzyme Sau3AI. The wild type allele contains a Sau3AI restriction site that yields two products of similar size (~250-300 bp) on a 2% agarose gel (Midsci, St. Louis, MO) whereas the bm12 allele has a mutated restriction site that does not permit digestion, yielding the original product of 554 bp.

### *T-suppressor Assay*

Unlabeled CD4<sup>+</sup>FoxP3/GFP<sup>-</sup> ABM TCR transgenic T cells were stimulated with DAPI<sup>-</sup> FITC<sup>+</sup>CD11b<sup>+</sup>Ly6C<sup>-</sup> CD169<sup>+</sup> macrophages from FITC painted bm12 mice as described for CellTrace Violet labeled cells in MLR experiments. After 96 h of culture, CD4<sup>+</sup>FoxP3/GFP<sup>+</sup> cells were FACS sorted and cultured at the indicated ratio with FACS sorted 5.0 x 10<sup>4</sup> CellTrace Violet labeled CD4<sup>+</sup>FoxP3/GFP<sup>-</sup> ABM TCR transgenic T cells and 2.5 x 10<sup>4</sup> FACS sorted CD90<sup>-</sup> (T-depleted) splenocytes in IMDM media supplemented with 10% FBS and 20 ng/ml IL-2. Proliferation was analyzed after 96 hours, gated on CD4<sup>+</sup>Va2<sup>+</sup>Vb8<sup>+</sup> TCR transgenic T cells but excluding GFP<sup>+</sup> and CellTrace Violet<sup>-</sup> cells in order to exclude the added Tregs from analyses.

## SUPPLEMENTAL FIGURES AND LEGENDS

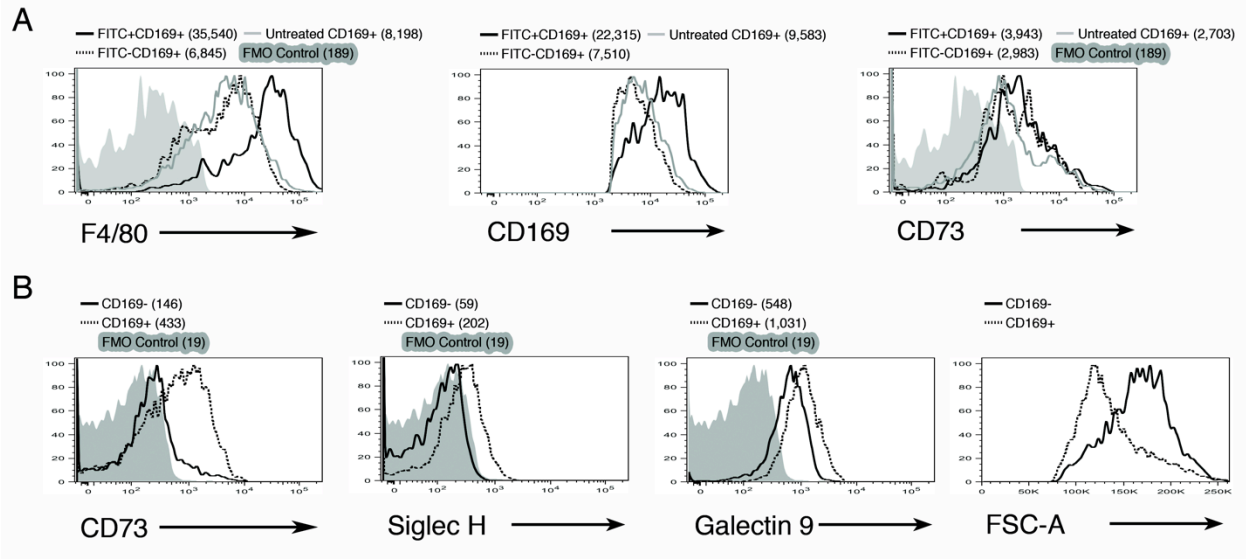

**Supplemental Figure 1: CD169<sup>+</sup> Tissue-resident macrophages that migrate to the dLN express more CD73, siglec-H, and galectin-9 than CD169<sup>-</sup> APCs. (A)** dLN cells from FITC painted and untreated C57BL/6 mice were stained and gated as described in **Figure 2**. The expression of the indicated markers on FITC<sup>+</sup>CD11b<sup>+</sup>Ly6C<sup>-</sup>CD169<sup>+</sup> macrophages and FITC<sup>-</sup>CD11b<sup>+</sup>Ly6C<sup>-</sup>CD169<sup>+</sup> macrophages from FITC painted C57BL/6 mice, and CD11b<sup>+</sup>Ly6C<sup>-</sup>CD169<sup>+</sup> macrophages from unpainted C57BL/6 mice, are shown. FITC<sup>+</sup>CD11b<sup>+</sup>Ly6C<sup>-</sup>CD169<sup>+</sup> macrophages express higher levels of F4/80 and CD169, but similar levels of CD73, as compared to either FITC<sup>+</sup>CD11b<sup>+</sup>Ly6C<sup>-</sup>CD169<sup>+</sup> macrophages from FITC painted mice or CD11b<sup>+</sup>Ly6C<sup>-</sup>CD169<sup>+</sup> macrophages from unpainted mice. **(B)** An extended phenotype of CD169<sup>+</sup> macrophages and CD169<sup>-</sup> APCs from the dLN of wild type C57BL/6 FITC painted mice is shown. Cells were stained and analyzed as described in **Figure 2A**. CD169<sup>+</sup> macrophages possess lower forward scatter properties and express higher levels of CD73, siglec-H, and galectin-9

as compared to CD169<sup>-</sup> APCs. Shaded histograms represent the FMO controls. MFIs are noted parenthetically.

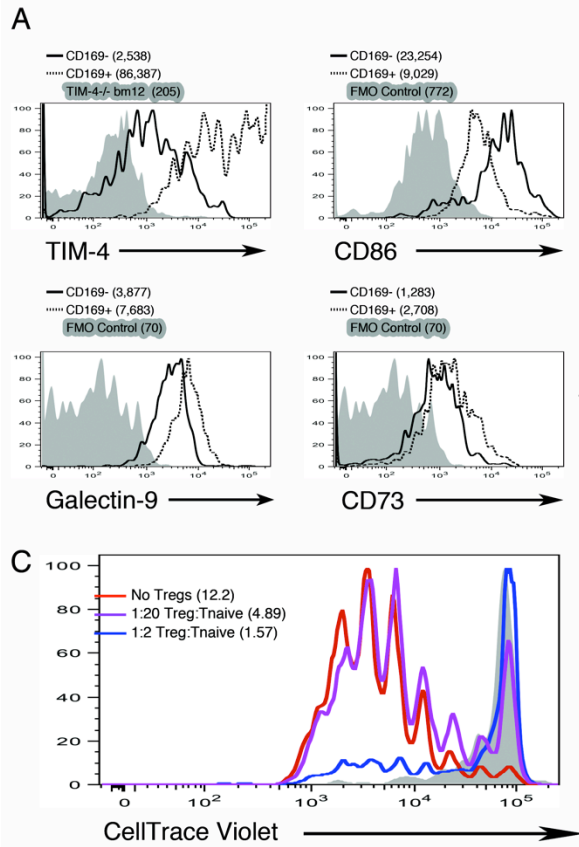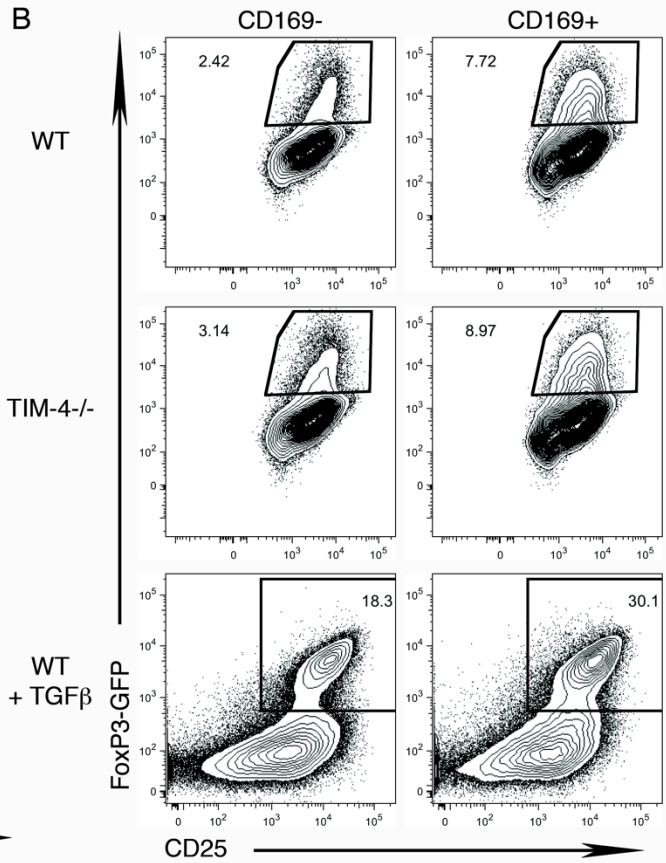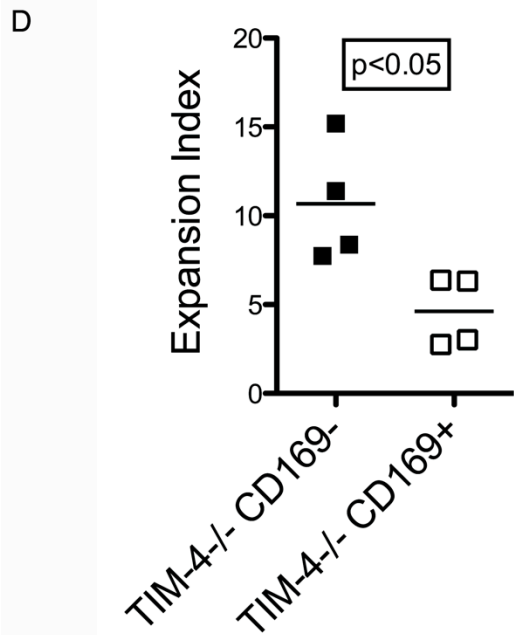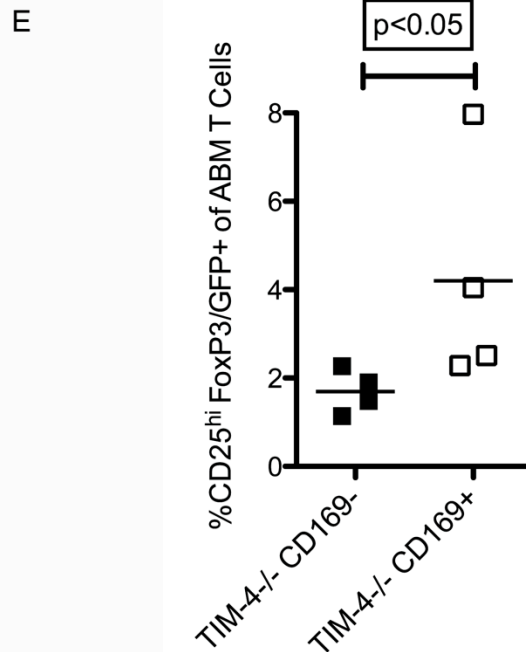

**Supplemental Figure 2: FoxP3/GFP<sup>+</sup> Tregs from CD169<sup>+</sup> macrophage stimulated**

**cultures are immunoregulatory. (A)** dLN cells from FITC painted bm12 mice were

stained and gated as described in **Figure 2** for C57BL/6 dLN cells. The phenotype of

FITC<sup>+</sup>CD11b<sup>+</sup>Ly6C<sup>-</sup>CD169<sup>+</sup> relative to CD169<sup>-</sup> bm12 cells is similar to C57BL/6 mice in

**Figure 2. (B)** Flow cytometry plots depict FoxP3/GFP reporter and CD25 expression in

ABM TCR transgenic (CD4<sup>+</sup>Vα2<sup>+</sup>Vβ8<sup>+</sup>) T cells stimulated with wild type (**top**) or TIM-4<sup>-/-</sup>

(**middle**) CD169<sup>-</sup> (**left**) or CD169<sup>+</sup> (**right**) APCs in the presence (**bottom**) or absence of

5 ng/ml TGFβ as indicated. (**C**) Unlabeled CD4<sup>+</sup>FoxP3/GFP<sup>+</sup> ABM TCR transgenic

Tregs from CD169<sup>+</sup> macrophage stimulated MLR cultures were sorted and re-cultured

with 2.5 x 10<sup>4</sup> sorted CD90<sup>-</sup> (T-depleted) bm12 splenocytes and CellTrace Violet labeled

FoxP3/GFP<sup>-</sup> ABM TCR transgenic responder T cells at the indicated ratio for 96 hours.

The shaded histogram represents the unstimulated control cells. Proliferation

histograms for responder T cells are shown. Expansion indices are indicated

parenthetically. (**D**) The expansion indices are plotted for ABM TCR transgenic T cells

stimulated with TIM-4<sup>-/-</sup> APC populations. (**E**) The frequencies (mean +/- S.D.) of

CD25<sup>hi</sup>FoxP3/GFP<sup>+</sup> cells within the gated transgenic CD4<sup>+</sup>Vα2<sup>+</sup>Vβ8<sup>+</sup> population in TIM-

4<sup>-/-</sup> APC stimulated cultures are graphed.

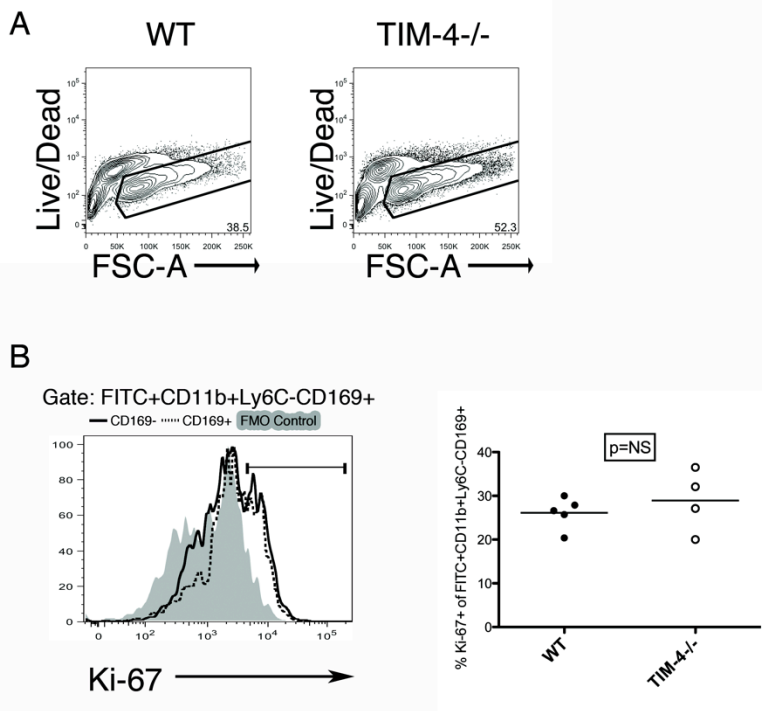

**Supplemental Figure 3: The increase in dLN migrating CD169<sup>+</sup> macrophages in TIM-4<sup>-/-</sup> as compared to wild type hosts is due to an increase in viability and not proliferation. (A)** We identified viable FITC<sup>+</sup>CD11b<sup>+</sup>Ly6C<sup>-</sup>CD169<sup>+</sup> cells by excluding dying cells undergoing shrinkage (FSC-A) and dead cells staining with DAPI in wild type (left) or TIM-4<sup>-/-</sup> (right) FITC painted mice. **(B)** The percent of FITC<sup>+</sup>CD11b<sup>+</sup>Ly6C<sup>-</sup>CD169<sup>+</sup> dLN cells expressing the proliferation-specific antigen Ki-67 is similar in wild type (solid line and filled circles) and TIM-4<sup>-/-</sup> (dashed line and open circles) FITC painted mice, p=N.S. by Mann-Whitney t test.



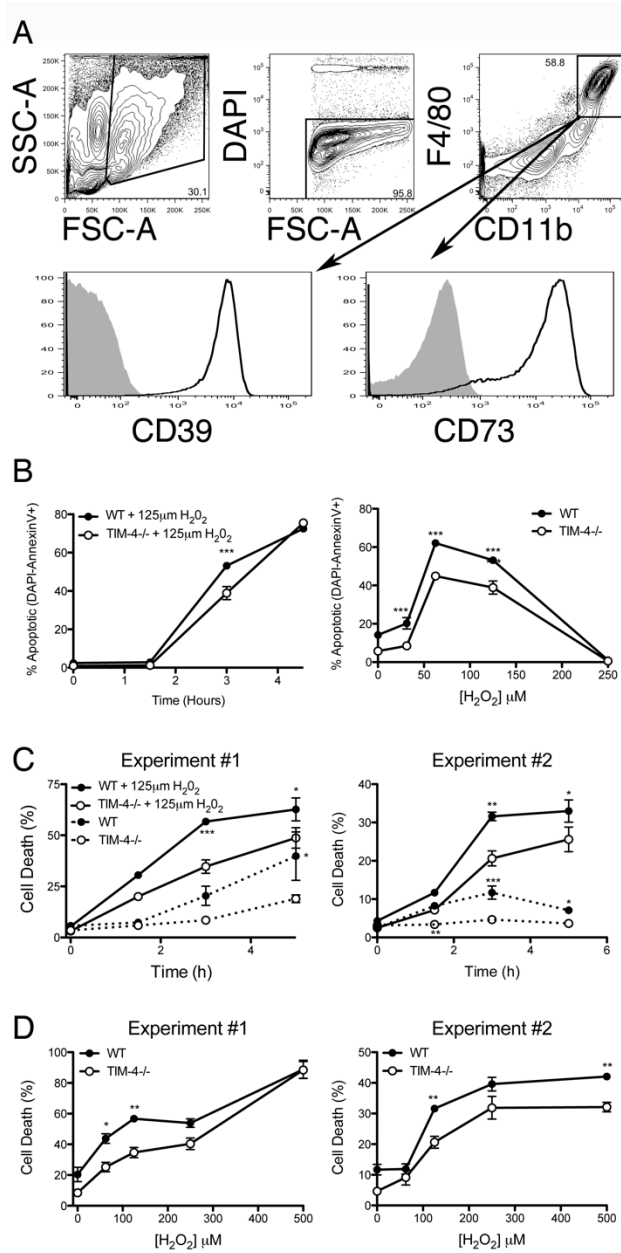

**Supplemental Figure 4: *TIM-4*<sup>-/-</sup> peritoneal macrophages are resistant to peroxide induced apoptosis relative to wild type macrophages. (A)** For peritoneal macrophage phenotype data, we identified viable peritoneal macrophages by size and light scattering properties (panel 1), viability (panel 2), and the expression of CD11b and F4/80 (panel 3). CD39 and CD73 expression on gated CD11b<sup>+</sup>F4/80<sup>+</sup> cells is shown

**(bottom). (B)** Peritoneal macrophage apoptosis was measured by flow cytometry as described in **Figure 5C. (C&D)** C57BL/6 wild type (filled circles) or TIM-4<sup>-/-</sup> (open circles) peritoneal macrophages were plated in 96 well plates, stained with anti-F4/80-PE and DAPI, and cultured with (solid line) or without (dashed line) H<sub>2</sub>O<sub>2</sub> (125 μM unless otherwise indicated). Using an F4/80<sup>+</sup> macrophage gate, we calculated the frequency of dead (DAPI<sup>+</sup>) macrophages on a Celigo plate imaging cytometer. Means +/- S.E.M. from each of two independent experiments are plotted according to time **(C)** or dose **(D)**. A two-way ANOVA revealed a significant difference between wild type (filled circles) and TIM-4<sup>-/-</sup> (open circles) groups for time (p<0.001) and dose (p<0.0001) in both experiments. For all panels, Bonferroni's post-test results are indicated as: \*, p<0.05; \*\*, p<0.01; \*\*\*, p<0.001.

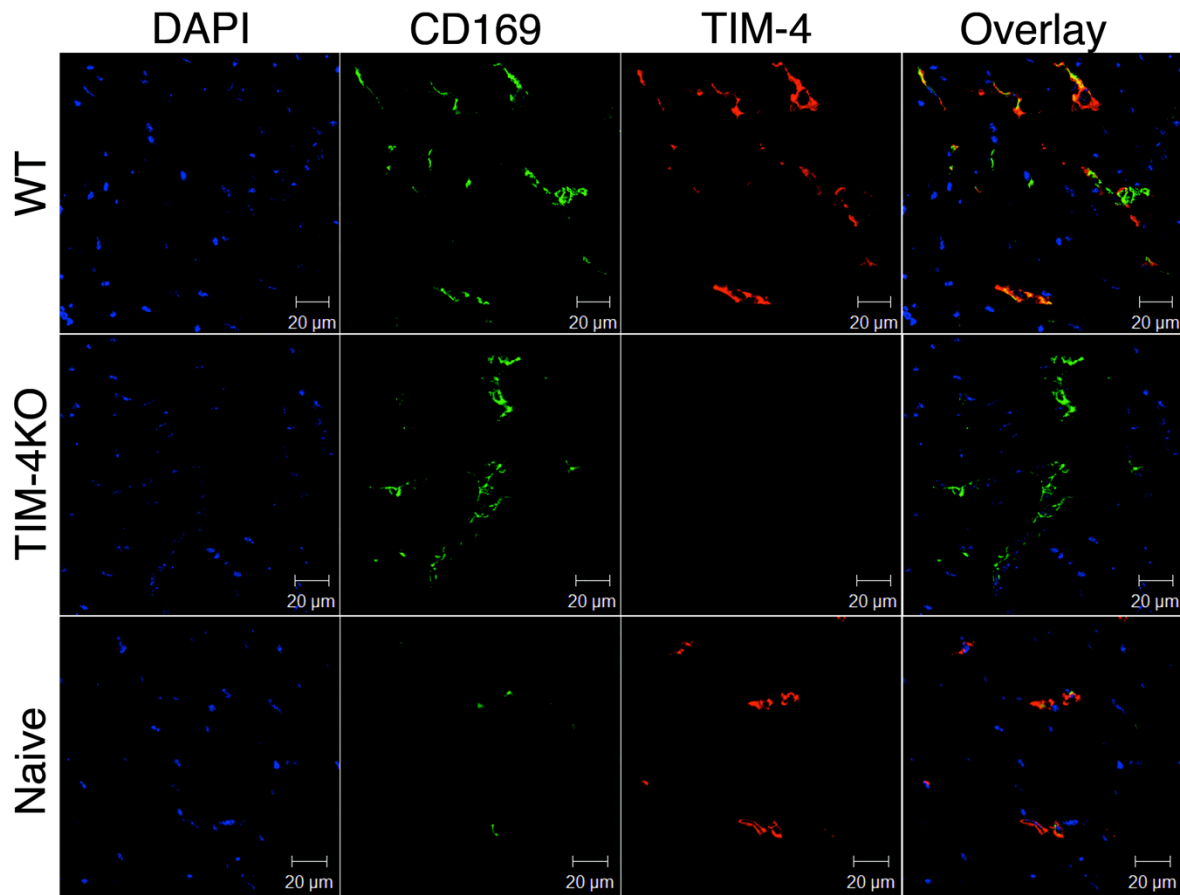

**Supplemental Figure 5: CD169<sup>+</sup> macrophages in donor hearts are donor-derived and co-express TIM-4.** Three days after transplantation into wild type BALB/c recipients, C57BL/6 wild type or TIM-4<sup>-/-</sup> hearts were removed, snap-frozen in OCT medium, sectioned at 5 μm, and stained with anti-CD169, anti-TIM-4, and DAPI. The naïve control heart was obtained from an untransplanted C57BL/6 mouse. CD169<sup>+</sup> macrophages in wild type but not TIM-4<sup>-/-</sup> hearts are TIM-4<sup>hi</sup>, demonstrating that TIM-4<sup>hi</sup>CD169<sup>+</sup> macrophages are donor tissue-resident macrophages.

### A skin transplantation

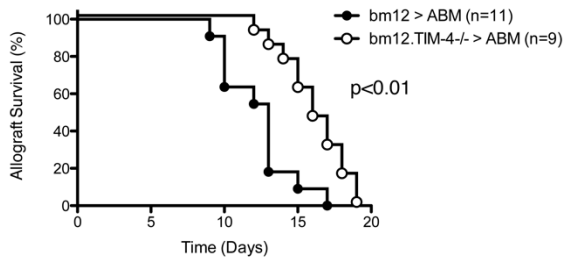

### B heart transplantation

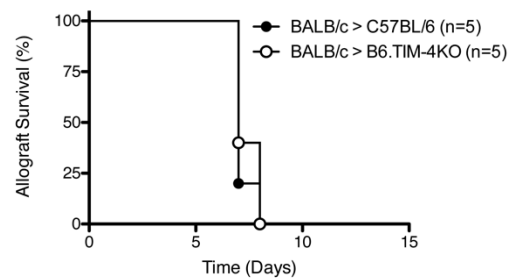

**Supplemental Figure 6: TIM-4<sup>-/-</sup> bm12 skin allograft survival in ABM TCR transgenic recipients is prolonged but wild type heart allografts exhibit comparable survival in wild type and TIM-4<sup>-/-</sup> C57BL/6 mice. (A)** Wild type bm12 (filled circles) or TIM-4<sup>-/-</sup> bm12 (open circles) tail skin was transplanted onto ABM TCR transgenic mice. The survival of TIM-4<sup>-/-</sup> bm12 skin allografts was significantly prolonged as compared to wild type bm12 transplants;  $p < 0.01$  by log-rank Mantel-Cox analysis. **(B)** Wild type BALB/c hearts were transplanted into allogeneic wild type (filled circles) or TIM-4<sup>-/-</sup> (open circles) C57BL/6 recipients as described in **Figure 6**. The survival was comparable between both groups;  $p = \text{N.S.}$  by log-rank Mantel-Cox analysis.

## SUPPLEMENTAL TABLES

**Supplemental Table I: Real-time PCR primer sequences**

| Transcript  | Forward Primer (5' to 3') | Reverse Primer (5' to 3') |
|-------------|---------------------------|---------------------------|
| GAPDH       | AGGTCGGTGTGAACGGA TTTG    | TGTAGACCATGTAGTTGAGGTCA   |
| CD169       | AGTGATAGCAACCGCTGGTTA     | GCACAGGTAGGGTGTGGAAC      |
| CD86        | TCAATGGGACTGCATATCTGCC    | CAGCTCACTCAGGCTTATGTTTT   |
| CD80        | ACCCCAACATAACTGAGTCT      | TTCCAACCAAGAGAAGCGAGG     |
| TGF $\beta$ | CTCCCGTGGCTTCTAGTGC       | GCCTTAGTTTGGACAGGATCTG    |
| Tbet        | AGCAAGGACGGCGAATGTT       | GGGTGGACATATAAGCGGTTC     |
| GATA3       | CTCGGCCATTCGTACATGGAA     | GGATACCTCTGCACCGTAGC      |
| FoxP3       | CCCATCCCCAGGAGTCTTG       | ACCATGACTAGGGGCACTGTA     |
| TRIB1       | GCTCGGCTCTTCAAGCAGATT     | GCTTTCCAGTCTAAGCTGGGT     |
| CD39        | AAGGTGAAGAGATTTTGCTCCAA   | TTTGTTCTGGGTCAGTCCCAC     |
| CD73        | GGACATTTGACCTCGTCCAAT     | GGGCACTCGACACTTGGT        |
| TIM-4       | CACCTGGCTCCTTCTCACAA      | TGATTGGATGCAGGCAGAGTT     |
| galectin-9  | ATGCCCTTTGAGCTTTGCTTC     | AACTGGACTGGCTGAGAGAAC     |
